# Supplementary material for: Rapid seroconversion and persistent functional IgG antibodies in severe COVID-19 patients correlates with an IL-12p70 and IL-33 signature
Source: PubMed Central journal article supplement (PMC7876035; doi:10.1038/s41598-021-83019-0), 2021-02-10
Supplement: 41598_2021_83019_MOESM1_ESM.pdf [file 41598_2021_83019_MOESM1_ESM.pdf]

## **Supplementary information**

### **Rapid seroconversion and persistent functional IgG antibodies in severe COVID-19 patients correlates with an IL-12p70 and IL-33 signature**

Munitz A<sup>1,\*</sup>, Edry-Botzer L<sup>1</sup>, Itan M<sup>1</sup>, Tur-Kaspa R<sup>2</sup>, Dicker D<sup>3</sup>, Marcoviciu D<sup>3</sup>, Goren GM<sup>1</sup>, Mor M<sup>1</sup>, Lev S<sup>4</sup>, Gottesman T<sup>5</sup>, Muhsen K<sup>6</sup>, Cohen D<sup>6</sup>, Stein M<sup>7</sup>, Qimron U<sup>1</sup>, Freund NT<sup>1</sup>, Wine Y<sup>8</sup>, and Gerlic M<sup>1,\*</sup>.

<sup>1</sup> Department of Clinical Microbiology and Immunology, Sackler School of Medicine, Tel Aviv University, 6997801 Israel

<sup>2</sup> Department of Medicine D and the Liver Institute, Rabin Medical Center, Beilinson Hospital, Molecular Hepatology Research Laboratory, Felsenstein Medical Research Center Sackler School of Medicine Tel-Aviv University, Faculty of Medicine Bar-Ilan University, Liver Institute Rabin Medical Center Beilinson Hospital Petach-Tikva Israel 39100

<sup>3</sup> Internal Medicine D, Hasharon Hospital-Rabin Medical Center, Petach Tikva, Israel. Sackler School of Medicine, Tel Aviv University, 6997801 Israel

<sup>4</sup> Intensive care unit, Hasharon Hospital-Rabin Medical Center, Petach Tikva, Israel. Sackler School of Medicine, Tel Aviv University, 6997801 Israel

<sup>5</sup> Infectious diseases and infection control, Hasharon Hospital-Rabin Medical Center, Petach Tikva, Israel. Sackler School of Medicine, Tel Aviv University, 6997801 Israel

<sup>6</sup> Department of Epidemiology and Preventive Medicine, School of Public Health, Tel Aviv University, 6997801 Israel

<sup>7</sup> Allergy and Clinical Immunology Unit, Wolfson Medical Center, 6997801 and Sackler School of Medicine, Tel Aviv University, Israel

<sup>8</sup> The Shmunis School of Biomedicine and Cancer Research, The George S. Wise Faculty of Life Sciences, Tel Aviv University, 6997801 Israel

## Supplemental Tables

Supplementary Table 1 – Hospitalized patient characteristics

| Disease severity        | Gender | N= | Age (years)   | DPS (Days)    | Lymphocyte count (10 <sup>6</sup> /ml) | CRP (mg/L)  |
|-------------------------|--------|----|---------------|---------------|----------------------------------------|-------------|
| Mild (N=29)             | Female | 13 | 66.58 ± 19.07 | 18.08 ± 18.64 | 1.75 ± 0.63                            | 0.74 ± 0.66 |
|                         | Male   | 16 | 65.41 ± 14.68 | 29.75 ± 23.73 | 1.4 ± 0.63                             | 5.66 ± 4.78 |
| Moderate /Severe (N=28) | Female | 5  | 76.20 ± 4.71  | 16.00 ± 14.68 | 2.70 ± 4.36                            | 6.96 ± 5.37 |
|                         | Male   | 23 | 67.16 ± 15.36 | 21.22 ± 16.14 | 1.64 ± 2.10                            | 5.10 ± 7.76 |

Supplementary Table 2- anti RBD antigen

| Anti RBD IgG                 |                                                  |                                                  |
|------------------------------|--------------------------------------------------|--------------------------------------------------|
| Days post symptoms onset (n) | >2671 RLU<br>(Specificity 94.87%, 95% CI, n=195) | >3830 RLU<br>(Specificity 97.95%, 95% CI, n=195) |
|                              | Sensitivity                                      | Sensitivity                                      |
| 1-7 (n=13)                   | 46.15%                                           | 46.15%                                           |
| 8-14 (n=15)                  | 66.67%                                           | 66.67%                                           |
| >14 days (n=68)              | 92.65%                                           | 88.24%                                           |
| Total (n=96)                 | 82.29%                                           | 79.17%                                           |
| Anti-RBD IgM                 |                                                  |                                                  |
| Days post symptoms onset (n) | >2707 RLU<br>(Specificity 94.87%, 95% CI, n=195) | >3878 RLU<br>(Specificity 97.95%, 95% CI, n=195) |
|                              | Sensitivity                                      | Sensitivity                                      |
| 1-7 (n=13)                   | 53.85%                                           | 46.15%                                           |
| 8-14 (n=15)                  | 53.33%                                           | 40.00%                                           |
| >14 days (n=68)              | 95.59%                                           | 91.18%                                           |
| Total (n=96)                 | 83.33%                                           | 77.08%                                           |
| Anti-RBD IgA                 |                                                  |                                                  |
| Days post symptoms onset (n) | >709.3 RLU<br>(Specificity 94.85%, 95% CI, n=97) | >906.3 RLU<br>(Specificity 97.94%, 95% CI, n=97) |
|                              | Sensitivity                                      | Sensitivity                                      |
| 1-7 (n=13)                   | 61.54%                                           | 61.54%                                           |
| 8-14 (n=15)                  | 86.67%                                           | 73.33%                                           |
| >14 days (n=68)              | 91.18%                                           | 77.94%                                           |
| Total (n=96)                 | 86.46%                                           | 75.00%                                           |

In some patients more than one sample (different time points) was collected. This cohort also includes anonymous recovered patients which are not in Supplementary Table 1.

Supplementary Table 3 – Anti-RBD combined analysis using 98% specificity for each individual antibody

| Days post symptoms onset (n) | Negative | IgG | IgM | IgA | IgA & IgG | IgM & IgA | IgM & IgG | IgM & IgG & IgA | Sensitivity |
|------------------------------|----------|-----|-----|-----|-----------|-----------|-----------|-----------------|-------------|
| 1-7 (n=13)                   | 2        | 1   | 0   | 4   | 0         | 1         | 2         | 3               | 84.6%       |
| 8-14 (n=15)                  | 3        | 0   | 0   | 2   | 4         | 0         | 1         | 5               | 80.0%       |
| >14 days (n=68)              | 0        | 2   | 4   | 0   | 4         | 4         | 9         | 45              | 100.0%      |
| Total (n=96)                 | 5        | 3   | 4   | 6   | 8         | 5         | 12        | 53              | 94.8%       |

- In some patients more than one sample (different time points) was collected. This cohort also includes anonymous recovered patients which are not in Supplementary Table 1.

Supplementary Table 4 – Anti-NP antigen

| Anti NP IgG                  |                                                 |                                                 |
|------------------------------|-------------------------------------------------|-------------------------------------------------|
| Days post symptoms onset (n) | >1245 RLU<br>(Specificity 95.56%, 95% CI, n=90) | >1995 RLU<br>(Specificity 97.78%, 95% CI, n=90) |
|                              | Sensitivity                                     | Sensitivity                                     |
| 1-7 (n=13)                   | 53.85%                                          | 53.85%                                          |
| 8-14 (n=14)                  | 64.29%                                          | 57.14%                                          |
| >14 days (n=31)              | 96.77%                                          | 96.77%                                          |
| Total (n=58)                 | 79.31%                                          | 77.59%                                          |
| Anti-NP IgM                  |                                                 |                                                 |
| Days post symptoms onset (n) | >5982 RLU<br>(Specificity 95.56%, 95% CI, n=90) | >7466 RLU<br>(Specificity 97.78%, 95% CI, n=90) |
|                              | Sensitivity                                     | Sensitivity                                     |
| 1-7 (n=13)                   | 0%                                              | 0%                                              |
| 8-14 (n=14)                  | 28.57%                                          | 28.57%                                          |
| >14 days (n=31)              | 32.26%                                          | 32.26%                                          |
| Total (n=58)                 | 24.14%                                          | 24.14%                                          |
| Anti-NP IgA                  |                                                 |                                                 |
| Days post symptoms (n)       | >1891 RLU<br>(Specificity 95.56%, 95% CI, n=90) | >4500 RLU<br>(Specificity 97.78%, 95% CI, n=90) |
|                              | Sensitivity                                     | Sensitivity                                     |
| 1-7 (n=13)                   | 15.38%                                          | 0%                                              |
| 8-14 (n=14)                  | 57.14%                                          | 57.14%                                          |
| >14 days (n=31)              | 87.10%                                          | 54.84%                                          |
| Total (n=58)                 | 63.79%                                          | 43.10%                                          |

- In some patients more than one sample (different time points) was collected. This cohort also includes anonymous recovered patients which are not in Supplementary Table 1.

Supplementary Table 5 – Anti-NP combined analysis using 98% specificity for each individual antibody

| Days post symptoms (n) | Negative | IgG | IgM | IgA | IgA & IgG | IgM & IgA | IgM & IgG | IgM & IgG & IgA | Sensitivity |
|------------------------|----------|-----|-----|-----|-----------|-----------|-----------|-----------------|-------------|
| 1-7 (n=13)             | 6        | 7   | 0   | 0   | 0         | 0         | 0         | 0               | 53.8%       |
| 8-14 (n=14)            | 5        | 1   | 0   | 1   | 3         | 0         | 0         | 4               | 64.3%       |
| >14 days (n=31)        | 1        | 11  | 0   | 0   | 9         | 0         | 2         | 8               | 96.8%       |
| Total (n=58)           | 12       | 19  | 0   | 1   | 12        | 0         | 2         | 12              | 79.3%       |

- In some patients more than one sample (different time points) was collected. This cohort also includes anonymous recovered patients which are not in Supplementary Table 1.

Supplementary Table 6 – Anti-RBD and anti-NP IgGs combined analysis using 100% specificity for each individual antibody

| Days post symptoms onset (n) | Negative | Anti-RBD | Anti-NP | Anti-RBD & anti-NP | Sensitivity |
|------------------------------|----------|----------|---------|--------------------|-------------|
| 1-7 (n=13)                   | 11       | 0        | 0       | 2                  | 15.4%       |
| 8-14 (n=14)                  | 7        | 0        | 0       | 7                  | 50.0%       |
| >14 days (n=31)              | 1        | 0        | 6       | 24                 | 96.8%       |
| Total (n=58)                 | 19       | 0        | 6       | 33                 | 67.2%       |

- In some patients more than one sample (different time points) was collected. This cohort also includes anonymous recovered patients which are not in Supplementary Table 1.

## Supplemental Figures

Supplemental Figure 1

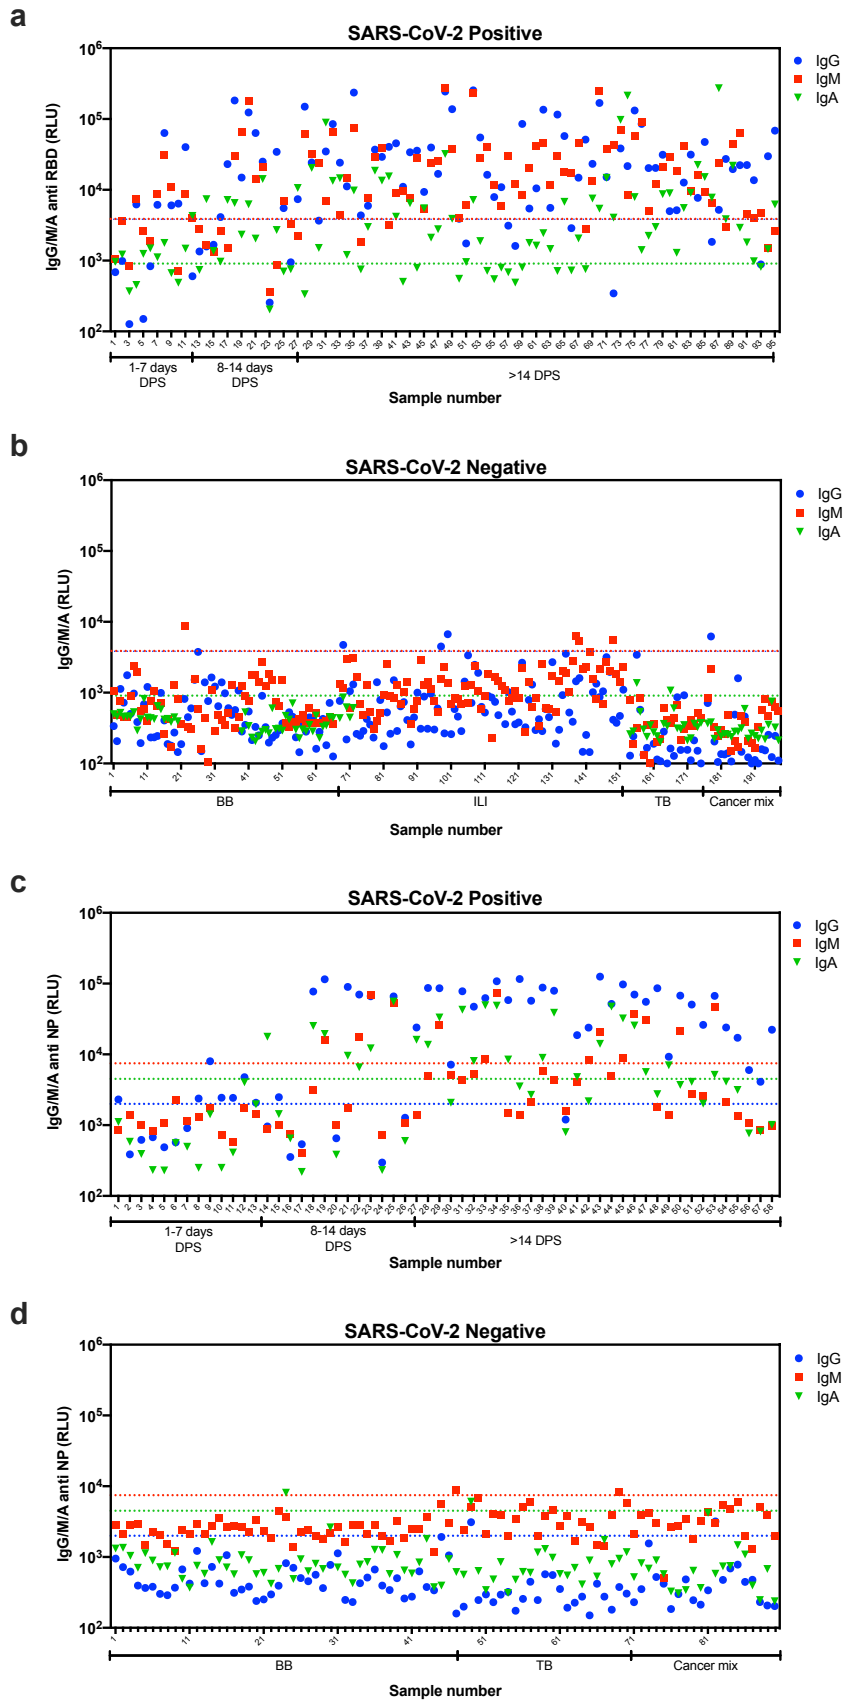

**Supplementary Figure 1. Individual anti-SARS-CoV-2-RBD and -NP antibodies using electrochemiluminescence ELISA.** Peripheral blood was collected from the peripheral blood of hospitalized COVID-19 patients and anonymous recovered patients. Negative samples were obtained from true SARS-CoV-2 negative patients (i.e., prior to the SARS-CoV-2 pandemic) (n=197). Plasma was obtained, diluted 1:50, and added to a 96-well plate precoated with SARS-CoV-2 RBD antigen. Individual IgG (blue), IgM (red), and IgA (green) levels of each SARS-CoV-2 positive (n=96 and n=58 for RBD and NP respectively) (a, c) and a negative sample (n=197 and n=90 for RBD and NP respectively) (b, d) are shown. Data were calculated using GraphPad Prism 8; the dotted line represents the calculated cutoff value discriminating between positive and negative samples.

Supplemental Figure 2

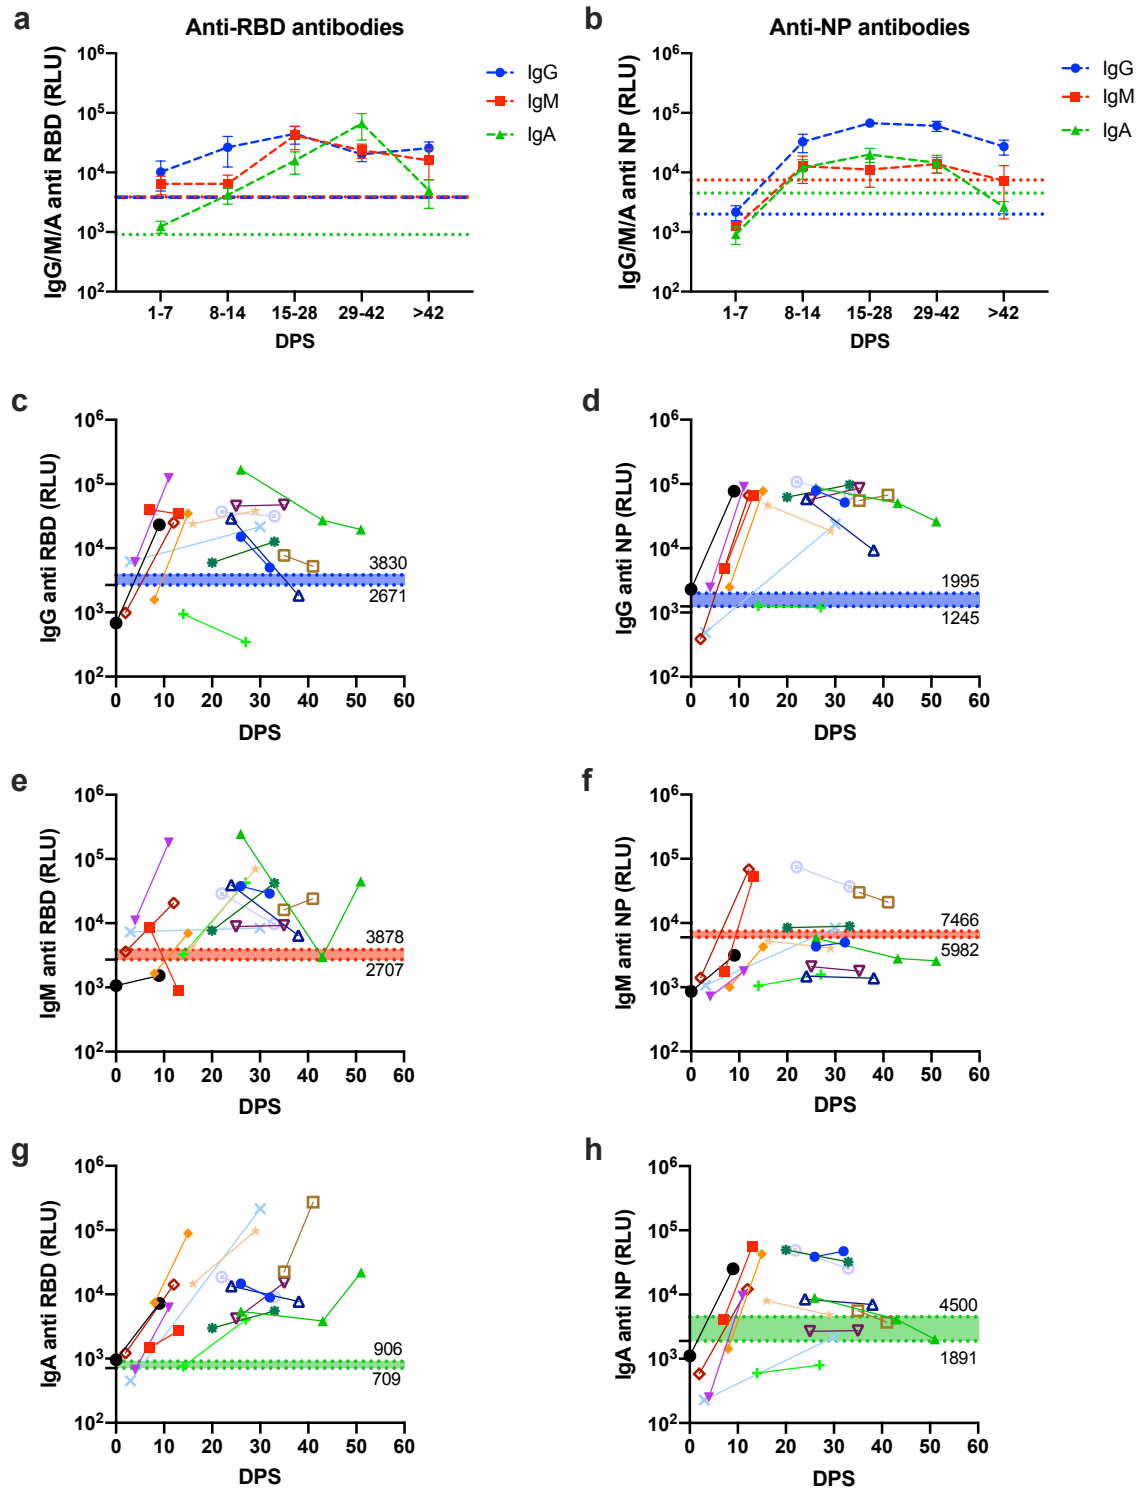

**Supplementary Figure 2. SARS-CoV-2 antibodies' response kinetics.** Peripheral blood was collected from hospitalized COVID-19 patients. Plasma was obtained, diluted 1:50, and added to a 96-well plate precoated with SARS-CoV-2 RBD (a, c, e, g) or NP (b, d, f, h) antigens. a, b Kinetics of all samples; average $\pm$ SEM; n=57. c-h Kinetics of individual patient's antibody response. Data were calculated using GraphPad Prism 8; the dotted line represents the calculated cutoff values (98% sensitivity for a, b, and 95% and 98% sensitivity for c-h) discriminating between positive and negative samples.



### Supplemental Figure 3

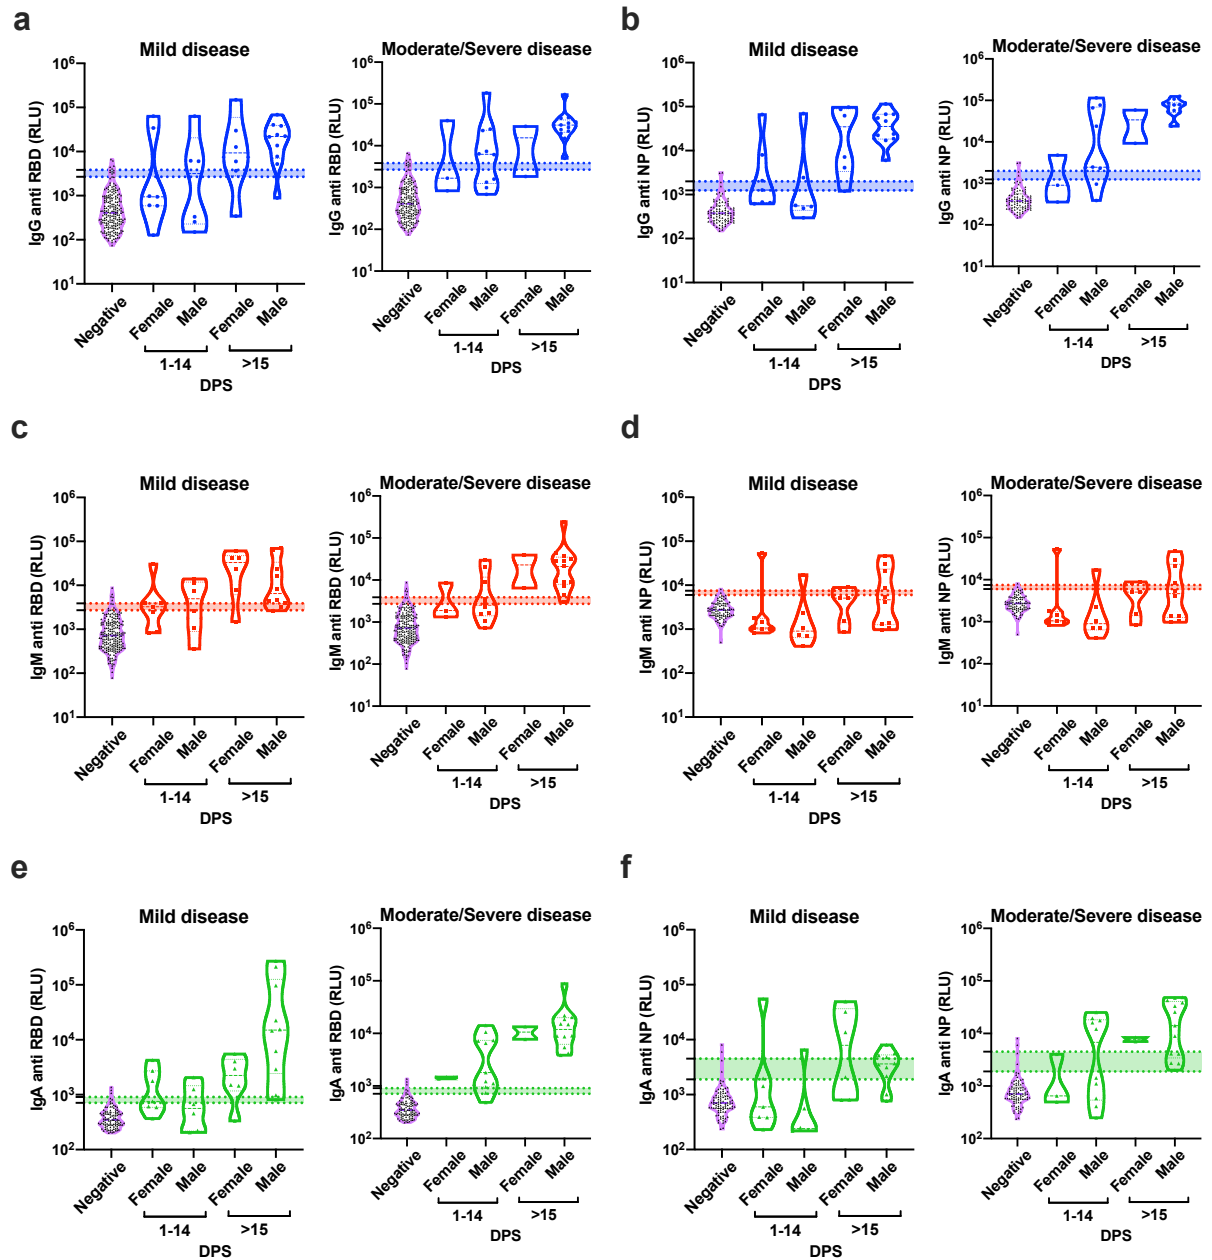

### Supplemental Figure 3. No correlation of antibodies' response to patient gender.

Peripheral blood was collected from hospitalized COVID-19 patients. Negative samples were obtained from true SARS-CoV-2 negative patients (i.e., prior to the SARS-CoV-2 pandemic). Plasma was obtained, diluted 1:50, and added to a 96-well plate precoated with SARS-CoV-2 RBD (a, c, e) or NP (b, d, f) antigens. Patients'

antibody results were grouped according to their gender and the disease severity and graphed against DPS (1-14 and >15). Data were calculated using GraphPad Prism 8; the dotted line represents the calculated cutoff values (95% and 98% sensitivity) discriminating between positive and negative samples. Statistical analysis was performed using a Nonparametric Kruskal-Wells test for multiple comparisons against between female and male groups. No significant difference was found between genders.

Supplemental Figure 4

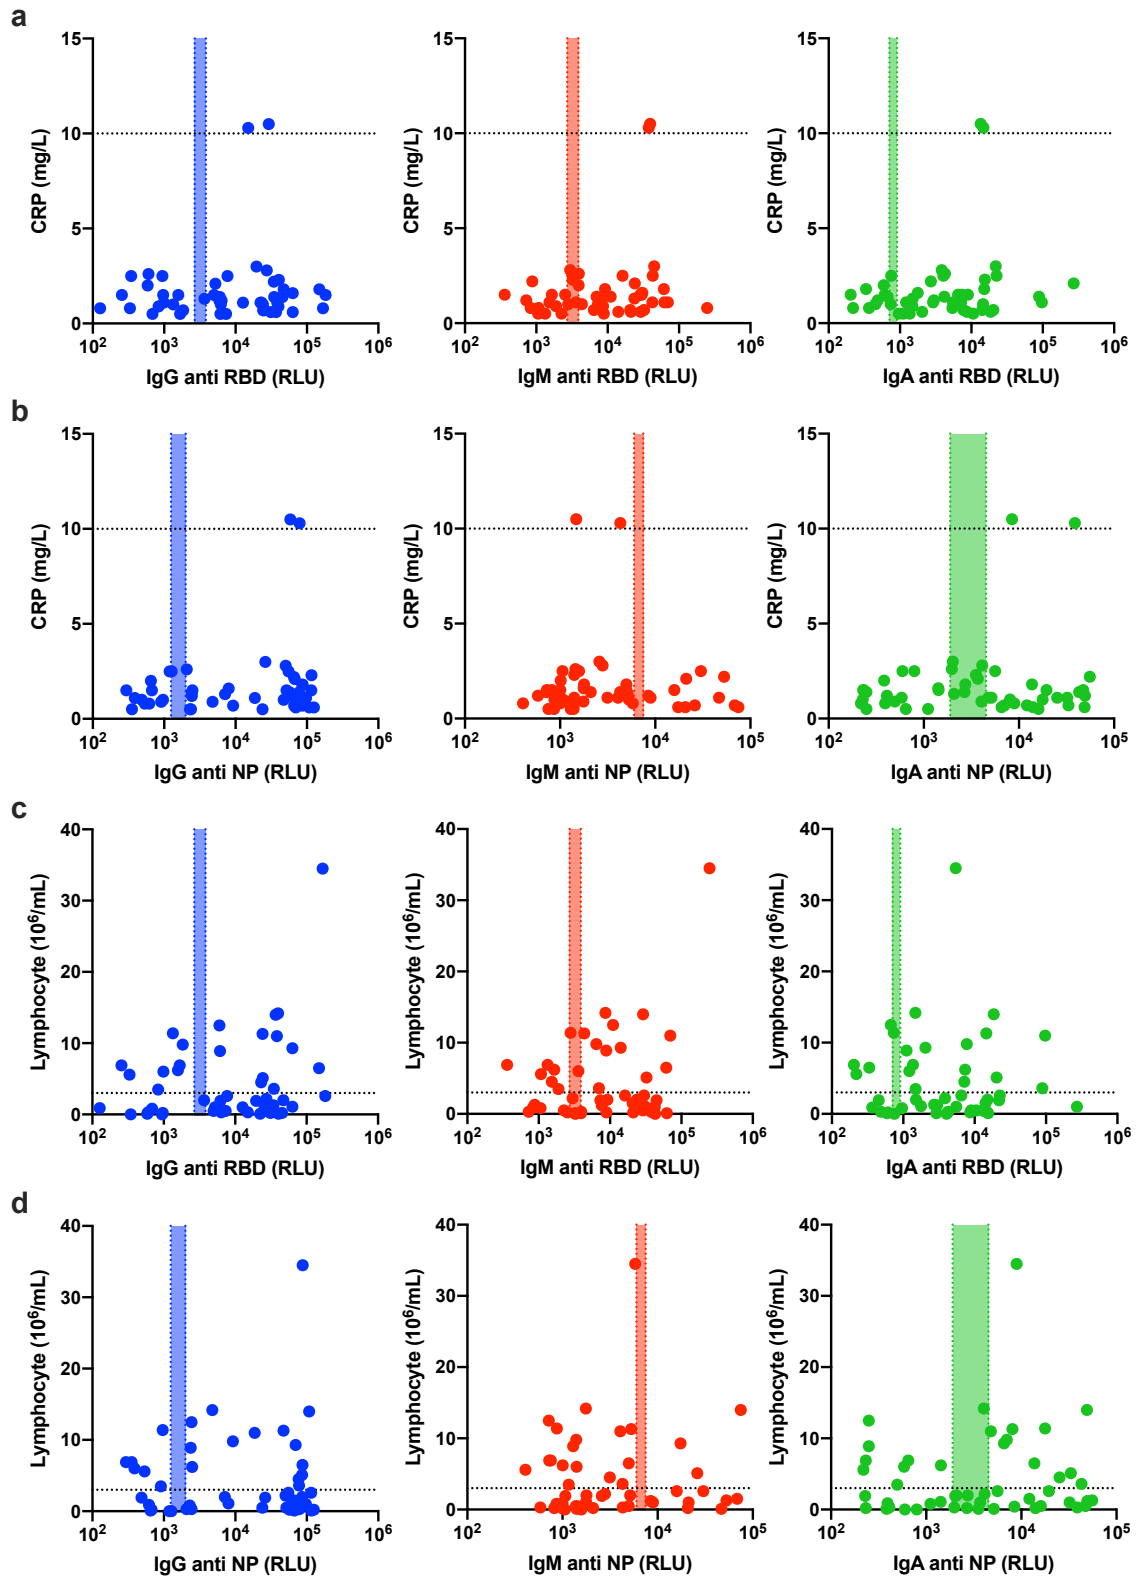

**Supplemental Figure 4. No correlation of antibodies' response to Lymphocyte count nor to the CRP levels.** Peripheral blood was collected from hospitalized COVID-19 patients. Lymphocyte count and CRP levels were determined immediately. Plasma was obtained, diluted 1:50, and added to a 96-well plate precoated with SARS-CoV-2 RBD (a, c) or NP (b, d) antigens. Patients' antibody results were graphed against the CRP levels (a-b) and the lymphocyte count (c-d). Data were calculated using GraphPad Prism 8; the dotted X-line represents the calculated cutoff values (95% and 98% sensitivity) discriminating between positive and negative samples, whereas the dotted Y-line represents the cutoff of high levels of either CRP (>10mg/L) or the lymphocyte count (>3x10<sup>6</sup>/mL). Correlation analysis was performed using a nonparametric Spearman's correlation test (two-tailed, 95% confidence). No correlation was found.

# Supplemental Figure 5

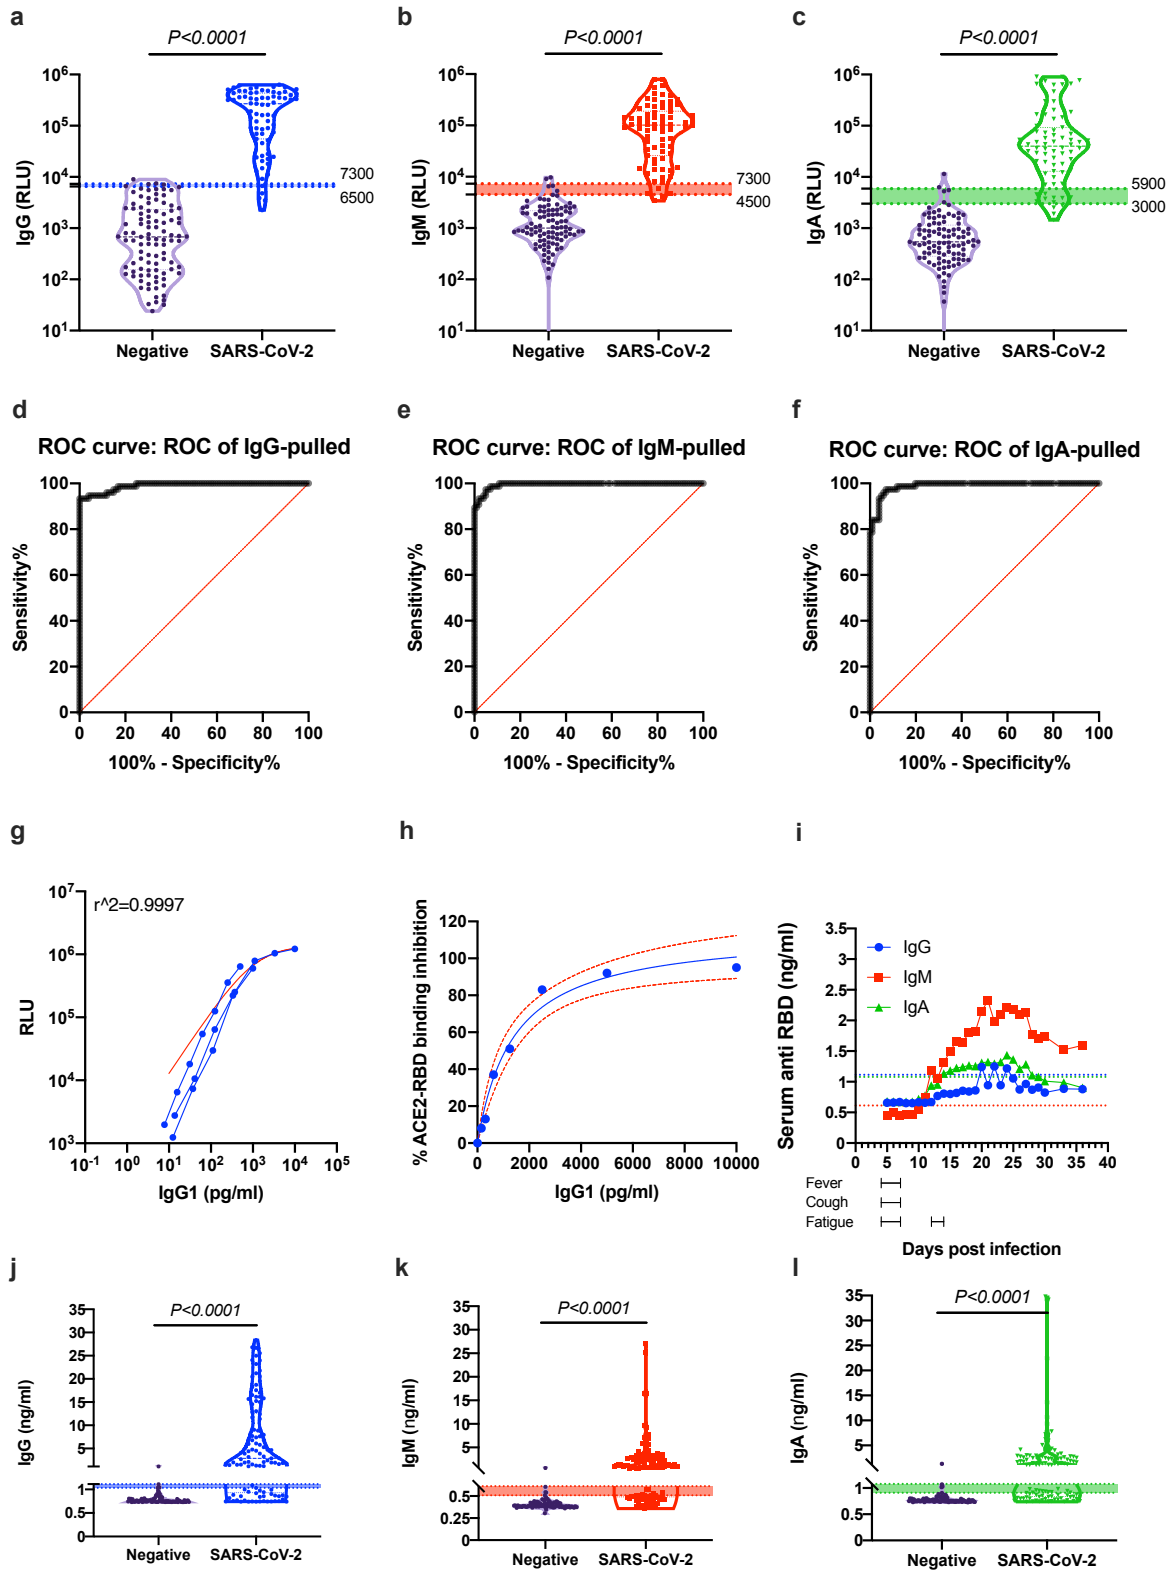

**Supplemental Figure 5. Validation of anti-SARS-CoV-2-RBD antibodies using spotted electrochemiluminescence ELISA.** Peripheral blood was collected from the hospitalized peripheral blood of COVID-19 and anonymous recovered patients (n=75). Negative samples were obtained from true SARS-CoV-2 negative patients (i.e., prior to the SARS-CoV-2 pandemic) (n=101). Plasma was obtained, diluted 1:50, and added to a 10-spot 96-well plate spotted with SARS-CoV-2 RBD antigen on spot number 1, and BSA on spots number 2-10. IgG (a), IgM (b), and IgA (c) levels as well as ROC analysis (d-f) are shown. g, Interpolation of IgG1 standard using spotted plates is shown. h, %ACE2-RBD inhibition was graphed against known amount of neutralizing IgG1 antibody. i, Kinetic of quantitative antibody response for individual patient. j-l, Quantitative antibody response for all patients (0-122 DPS) using RBD spotted plate is shown. Data were calculated using GraphPad Prism 8; the dotted line represents the calculated cutoff value discriminating between positive and negative samples. (a-c, j-l) A nonparametric Mann-Whitney t-test was performed. P values are shown.
